# Supplementary material for: Evolution of gene function and regulatory control after whole-genome duplication: Comparative analyses in vertebrates
Source: HighWire-hosted journal article supplement (doi:10.1101/gr.086827.108), 2009-05-13
Supplement: Supp_Fig_1.pdf [file Supp_Fig_1.pdf]

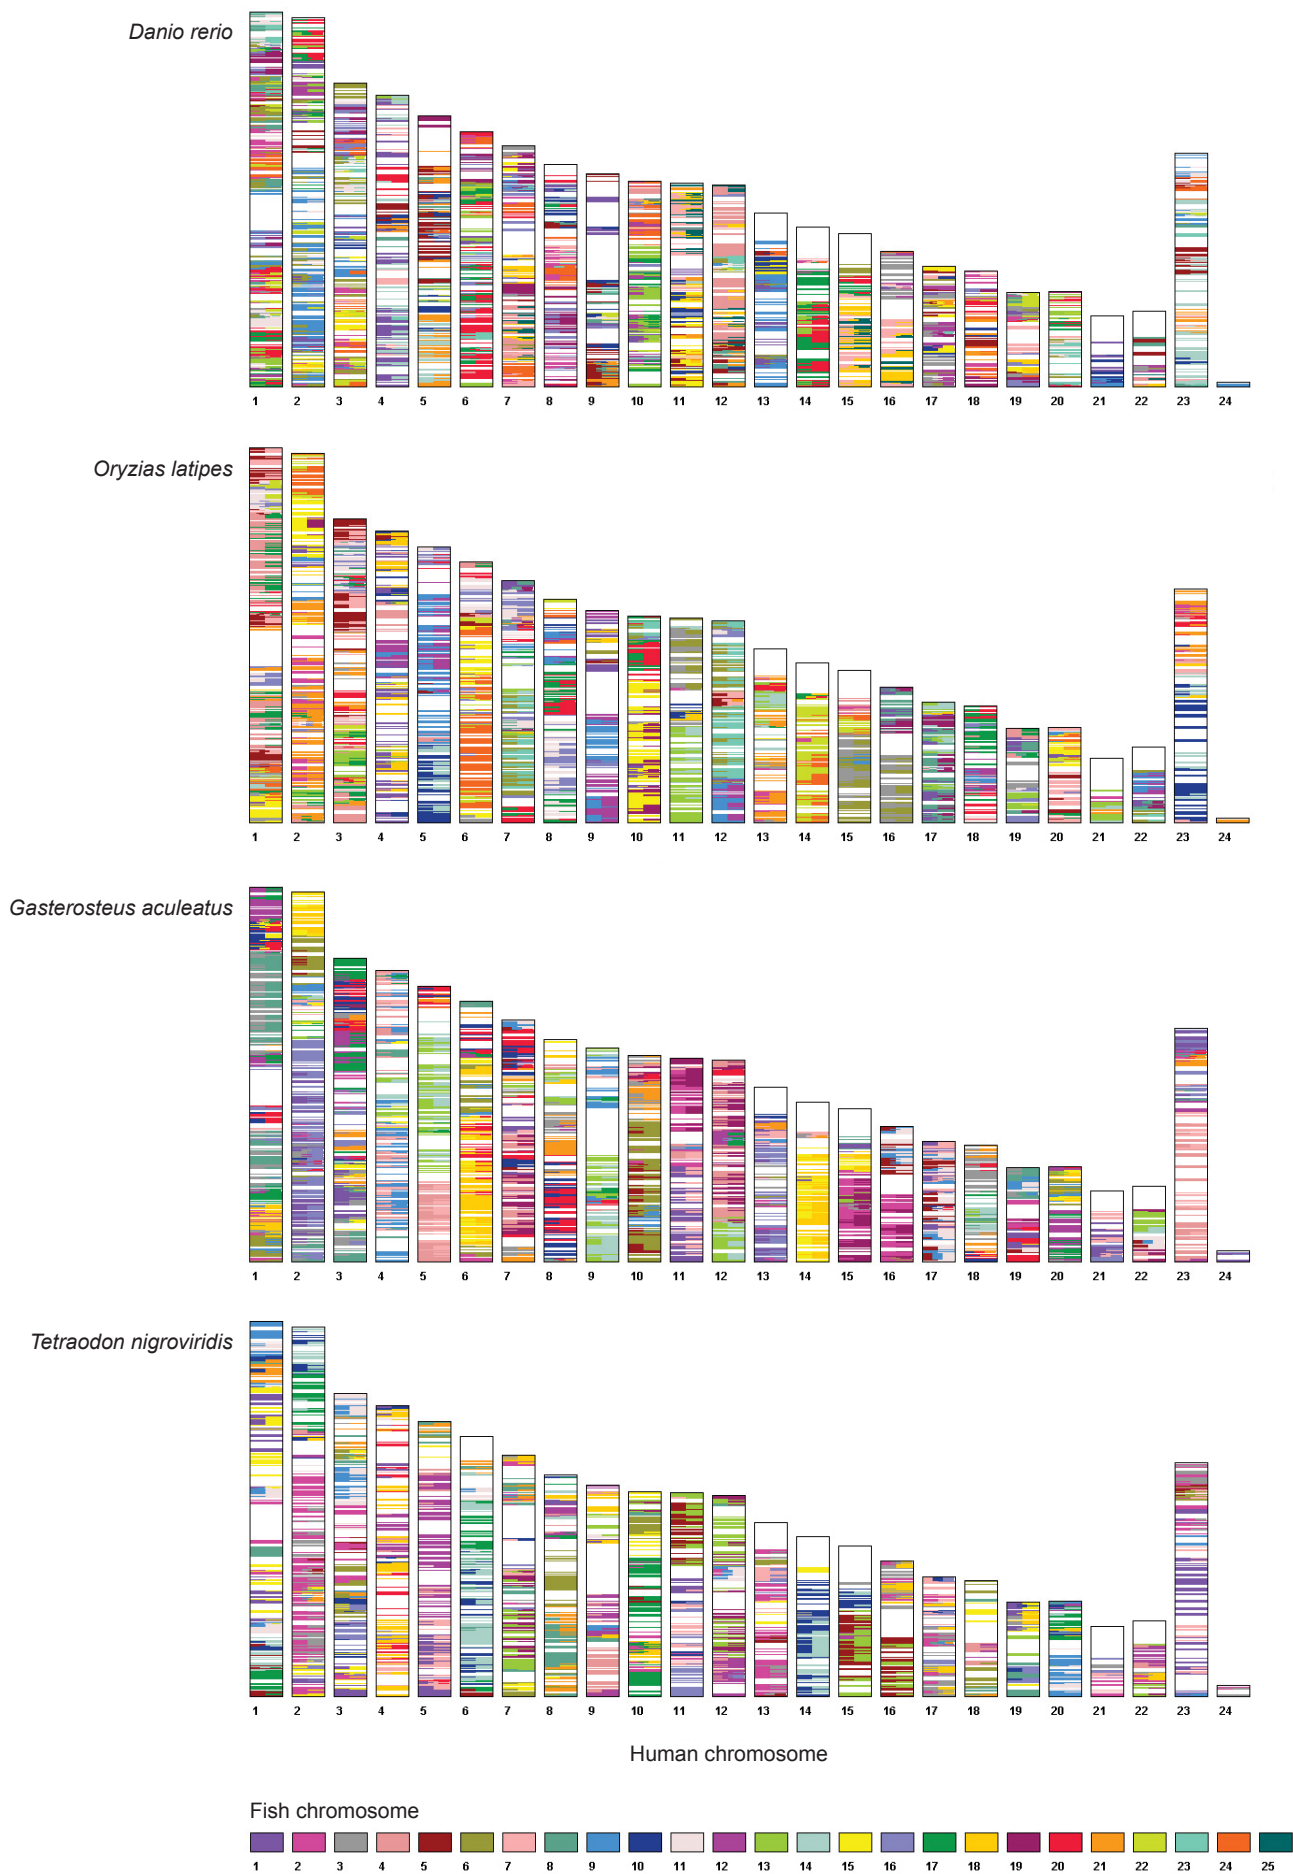

**Supplementary Figure 1:** Synteny maps of four fish species against human. Syntenic regions were identified using SSEARCH similarity matches (all-vs.-all) between human and fish proteomes and the iAdHoRe software.
